# Supplementary material for: Construction of a hybrid β-hexosaminidase subunit capable of forming stable homodimers that hydrolyze GM2 ganglioside in vivo
Source: PubMed Central journal article supplement — Mol Ther Methods Clin Dev. 2016 Mar 2;3:15057–. doi: 10.1038/mtm.2015.57 (PMC4774620; doi:10.1038/mtm.2015.57), 2016-03-02
Supplement: mtm201557-s1.pdf [file mtm201557-s1.pdf]

**Table S1: Amino acid changes to the HexA  $\alpha$ -subunit to convert the dimer interface from  $\alpha$  to  $\beta$  and to introduce the putative GM2A binding surface from  $\beta$ - onto the  $\alpha$ - subunit**

| Residue position<br>( $\alpha$ -numbering) | Change ( $\alpha$ to $\beta$ ) | Reason                                                |
|--------------------------------------------|--------------------------------|-------------------------------------------------------|
| 184                                        | Ser (S) to Lys (K)             | Generate $\beta$ dimer Interface                      |
| 209                                        | Pro (P) to Gln (Q)             | Generate $\beta$ dimer Interface                      |
| 228                                        | Asn (N) to Ser (S)             | Generate $\beta$ dimer Interface                      |
| 229                                        | Pro deleted                    | Generate $\beta$ dimer Interface                      |
| 230                                        | Val (V) to Leu (L)             | Generate $\beta$ dimer Interface                      |
| 231                                        | Thr (T) to Ser (S)             | Generate $\beta$ dimer Interface                      |
| 429                                        | Pro (P) to Gln (Q)             | Generate $\beta$ dimer Interface & GM2AP binding site |
| 432                                        | Lys (K) to Arg (R)             | GM2AP binding site                                    |
| 433                                        | Asp (D) to Lys (K)             | GM2AP binding site                                    |
| 436                                        | Ile (I) to Lys (K)             | GM2AP binding site                                    |
| 466                                        | Asn (N) to Ala (A)             | Generate beta dimer Interface                         |
| 491                                        | Ser (S) to Arg (R)             | GM2AP binding site                                    |

|     |                    |                                  |
|-----|--------------------|----------------------------------|
| 493 | Leu (L) to Met (M) | GM2AP binding site               |
| 494 | Thr (T) to Asp (D) | GM2AP binding site               |
| 495 | Phe (F) to Asp (D) | GM2A binding site                |
| 498 | Glu (E) to Asp (D) | GM2AP binding site               |
| 508 | Leu (L) to Val (V) | Generate $\beta$ dimer Interface |
| 513 | Gln (Q) to Ala (A) | Generate $\beta$ dimer Interface |
| 518 | Asn (N) to Tyr (Y) | Generate $\beta$ dimer Interface |
| 519 | Val (V) to Ala (A) | Generate $\beta$ dimer Interface |
| 521 | Phe (F) to Tyr (Y) | Generate $\beta$ dimer Interface |
| 523 | Glu (E) to Asn (N) | Generate $\beta$ dimer Interface |

**Table S2:** PCR Primers used to characterize exons 1 and 11 of HexA and Exon 1 of HexB in WT and HEKHexABKO lines (see **Fig. S2**).

| Gene/Region | ID    | Sequence                | Product Size (bp) |
|-------------|-------|-------------------------|-------------------|
| HexAexon1   | b-for | GGTCCTCCTGGGGTCGCA      | 470               |
|             | b-rev | CGAAAACAGGTCGGGAGACTAG  |                   |
| HexAexon2   | f-For | GAGGAGAAGAGGGGCACAAC    | 366               |
|             | f-Rev | CTGATGCTCGGCCTGGA       |                   |
| HexAExon1   | d-for | GCCTGGCAAGTCCTTTACCT    | 692               |
|             | d-rev | GGACAAGTCCGACTCACCTG    |                   |
| HexAintron1 | c-for | CCGCTGGAAACTCACTTCCT    | 446               |
|             | c-rev | GTGTTCAAGCTAGCCAGGGT    |                   |
| HexAexon1   | a-for | TCCTTTACCTCCCCGTAGGC    | 282               |
|             | a-rev | ACACCCTGCCCTTTCCTTC     |                   |
| HexAexon1   | e-for | GCTCCAGGCTTTGGTTTTTCG   | 229               |
|             | e-rev | CACCTGTGAGGTAAGGACGG    |                   |
| HexAexon11  | g-for | TTGCTGCTGGGGAACAGA      | 425               |
|             | g-rev | GTGTAACCCTTCCACCAACTCTC |                   |
| HexBexon1   | h-for | GTCATCTGACTCGGTGACTC    | 252               |
|             | h-rev | TTCGGGGTCATCTTCACCAAG   |                   |

## Supplementary Information: Figures

atgacctcttctagactgtgggttcagcctgctgctcgccgcagcctttgccggacggggccaccg  
ctctttggccgtggccccagaacttccagacctctgaccagcggtagctgctttacccaataa  
cttccagtttcagtaacgatgtgtccagcgcgcctcagccgggctgttccgtgctggacgaggcc  
ttccaacgctatcgcgaccttcttttcggatctggctcctggccaaggccatatctcaccggaa  
agagacacacccttgagaagaacgtcctcgtggtgagcgtggtgaccttggttgtaataact  
gccgacctggaatctgtcgcgagaattacactctgactattaacgacgaccaatgcctgcttctg  
tctgaaactgtctggggagcactgcggggacttgaaaccttcagccagctgggtgtggaagtacg  
cagagggaaaccttcttcatcaataagaccgaaatcgaggatcttccccgcttccctcatcgggg  
actgctgctggacactagccgccattatcttccgcttaagtccattctggataccctcgacgtg  
atggcatacaaaaactcaatgtgttccactggcatctgggtggacgaccagtcatttccctacg  
agtccttcaccttccccgaactcatgaggaaggggaagctactctctcagccacatctacaccgc  
ccaagacgtcaaggaagtcacgaatatgcacgcctgcgcggaattagagtgctcgcgagttc  
gacaccctggggcacaccctgagctggggacctggcatccctgggtctgctcactccctgctatt  
cagggtcagaaccttccgggtacttttggccctgtcaatcctagcctgaacaataacttacgagtt  
tatgtctactttcttccctggaagtctcatcagcttttccagacttctatctgcatctcggaggt  
gatgaagtggacttcacctggtggaagtcaaaccgccaaattcaagactttatgcggaagaagg  
gttctcggagaggatttcaaacaactggagagcttctacatccagacccttctcgacatcgtgtc  
ctcatacgggaaaggttacgtgggtctggcaggaagtgttcgacaataagggtgaagattcagccc  
gacaccattatccaagtctggcgggaggacatcccagtgaaactacatgaaggaacttgagctgg  
tgactaaggctgggttccgcgctcttctcagcgcctccatgggtatctcaatcggatctcttacgg  
acaggattggaggaagttctacaaagtcgaaccctggcttctcagggggaccttgagcagaag  
gctcttgtgatcggaggcgaggcctgcatgtggggagagtagctggatgccaccaacctgggtgc  
ccagactttggccaagggccggtgcccgtggctgaacgcctgtgggtcaaataagctgacctgcga  
tatggacgacgcctatgatagactttcacatttccggtgcgaactgggtgcggagaggggtggct  
gccagccgctgtacgccgggtactgcaaccaggagtttgagcagact

**Figure S1.** Codon optimized nucleotide sequence of the  $\alpha$ -derived hybrid ( $\mu$ ) subunit of homodimeric HexM.

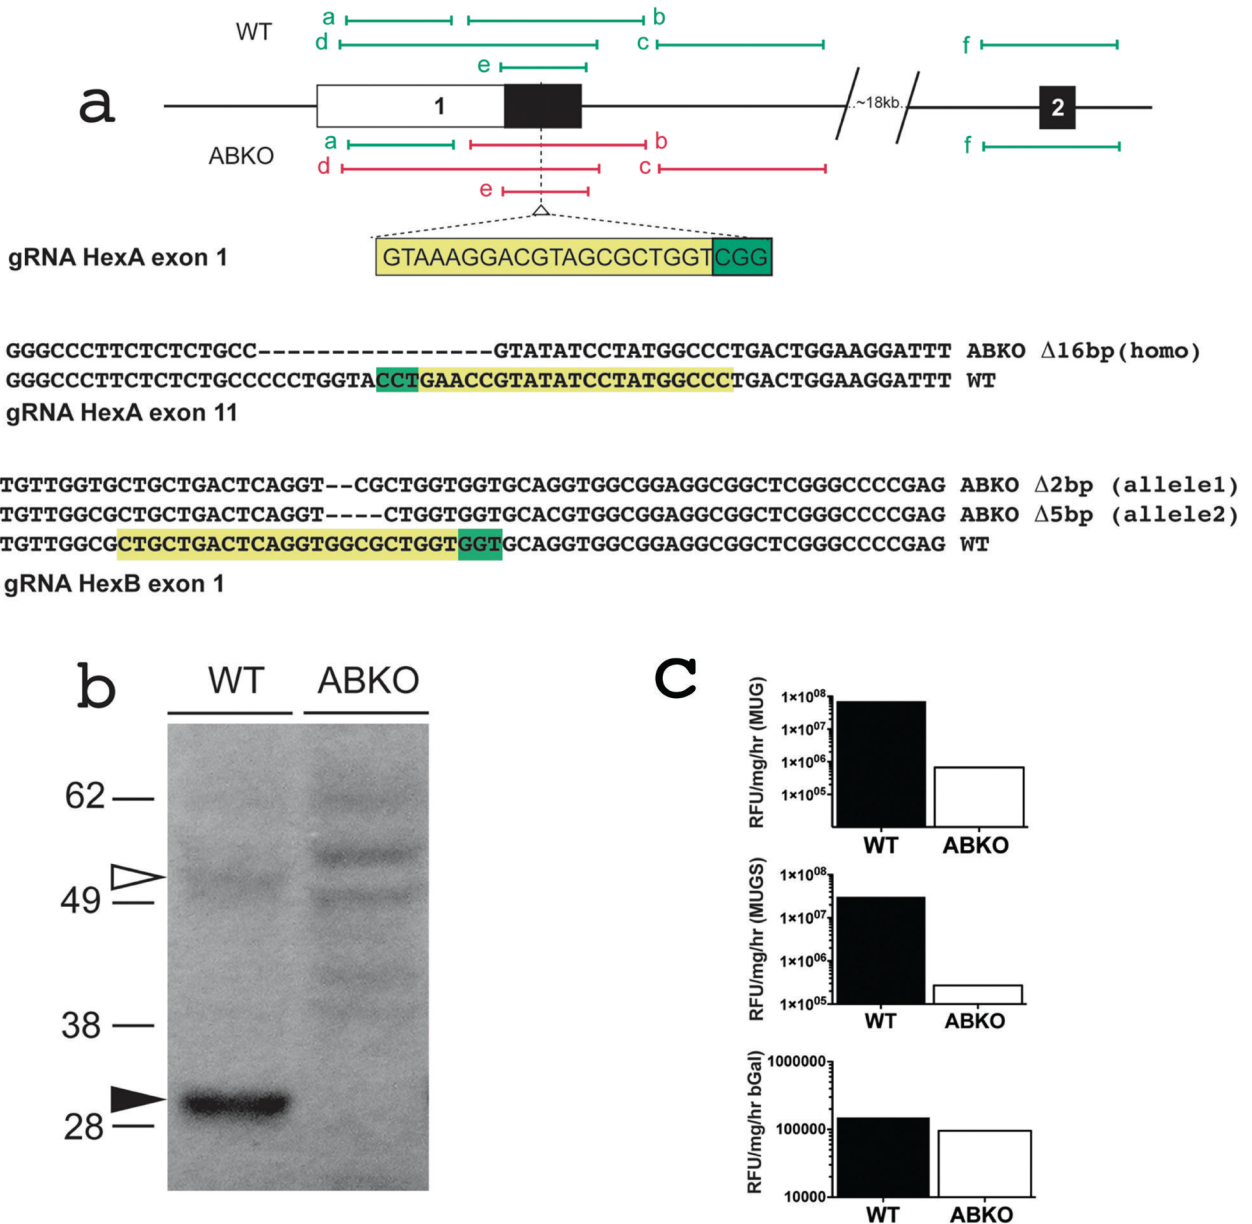

**Figure S2.** Characterization of HEKHexABKO cell line. (a) Highlighted in green and yellow are the three guide RNA sequences used to target exon1 and exon 11 of HexA and exon 1 of HexB in HEK293 cells. The upper schematic in panel a shows a scaled graphic representation of exons 1 and 2 (boxes), and the PCR primers (vertical bars) and their expected products (horizontal lines) used to characterize the large deletion in exon1 in the

ABKO line. Primers that resulted in products in the WT and ABKO lines are highlighted in green, those that only produced a product in the WT line are in red. Sequence of primers used to generate the PCR products are described in **Table S2** with the corresponding labels. Sequences surrounding the remaining guide RNAs in exon 11 of HexA and exon1 of HexB show the 16bp deletion that was found in exon 11 of both HexA alleles, and the 2bp or 5bp deletion found in exon1 of the two HexB alleles. Each of the deletions would result in a frame-shift followed by a prematurely terminated codon. **(b)** Comparison of the major  $\alpha$ - and  $\beta$ - polypeptide levels in the WT HEK cells (20  $\mu$ g) versus the HEXABKO line (ABKO, 40  $\mu$ g). Western blot of lysates from WT and ABKO lines were probed with antibody against human Hex A (recognized both the  $\alpha$ - and  $\beta$ - polypeptides). Even though five times the amount of protein was loaded in the case of ABKO lysates, bands corresponding to the polypeptides from either of the HexA subunits were only observed in WT lysate. **(c)** Comparison of Hex activity levels (log scale, Y-axis) in WT versus ABKO line. Specific activity of HexA/B and bGal enzymes in WT and ABKO lines were determined using the fluorogenic substrates MUGS, MUG and MUGal, respectively. Bgal activity levels in WT and ABKO lines are unchanged whereas MUGS and MUG activity in the ABKO line is reduced by more than 3 log orders in comparison to WT cells.
